# Supplementary material
Source: Springer Nature journal article supplement (https://www.springermedizin.de/resource/supplementary/13075_2009_2847_MOESM6_ESM.pdf/9693024)

### A) Healthy

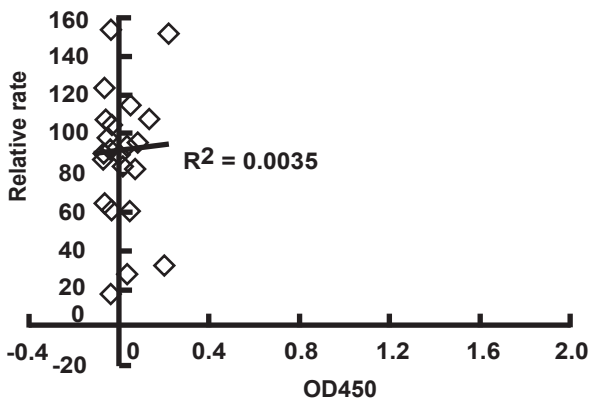

### B) without vasculopathy

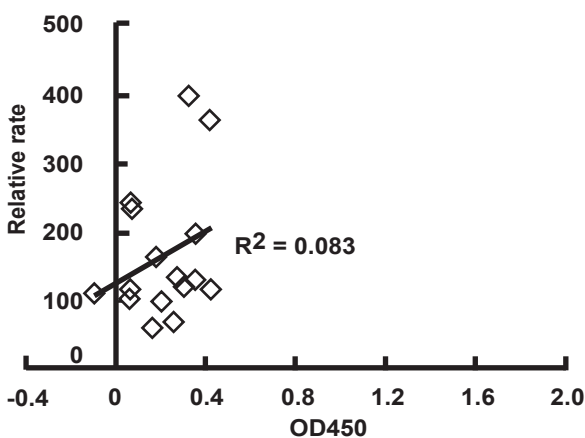

### C) with vasculopathy

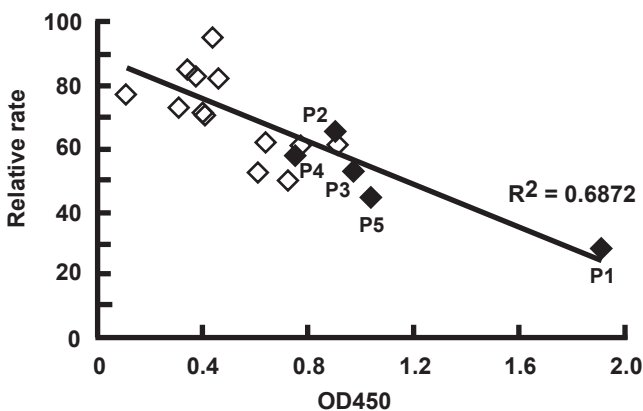

### D)

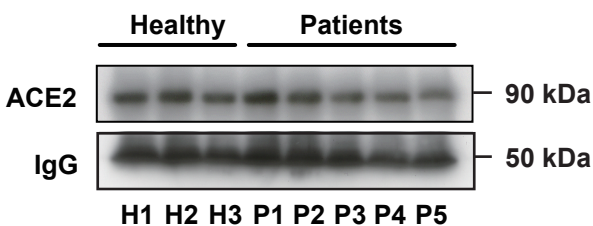

Supplement: MOESM6 [file 9693024]
